# Supplementary material
Source: publisher figshare collection journal article supplement (https://karger.figshare.com/articles/dataset/_/5241589)
Supplement: Supplementary file 1 [file 1]

In the article by Wang Q, Mejía-Guevara I, Rist PM, Walter S, Capistrant BD and Glymour MM, entitled 'Changes in memory before and after stroke differ by age and sex, but not by race' [Cerebrovasc Dis 2014;37:235–243, DOI: 10.1159/000357557], the following funding source has to be added: This study was supported by National Institute on Aging AG03438501.
